# Supplementary material
Source: publisher figshare collection journal article supplement (https://karger.figshare.com/articles/dataset/_/5644636)
Supplement: Supplementary file 1 [file 1 › 484348_sm1.xlsx]

## Sheet: supplementary demographics
Supplementary Table 1. The cause of death and indications of substance use disorders in the cohort.
The raw numbers are shown, and the percentage for each group.
Diagnosis	N	Alcohol Abuse	Alcohol Dependence	Amphetamine Abuse	Cannabis Abuse	Not Indicated	Opioid Abuse	Polysubstance Abuse	Polysubstance Dependence
Bipolar Disorder	26	5	4	0	0	4	1	8	4
Control	44	4	0	0	1	39	0	0	0
Schizophrenia	28	2	2	2	2	12	0	7	1
	N	Accident	Sudden medical condition	Suicide	Undetermined	Undetermined/Accidental overdose
Bipolar Disorder	26	5	5	10	1	5
Control	44	6	38	0	0	0
Schizophrenia	28	4	12	7	0	5
Percentage of group
Diagnosis		Alcohol Abuse	Alcohol Dependence	Amphetamine Abuse	Cannabis Abuse	Not Indicated	Opioid Abuse	Polysubstance Abuse	Polysubstance Dependence
Bipolar Disorder		0.192308	0.153846	0	0	0.153846	0.0384615	0.307692	0.153846
Control		0.0909091	0	0	0.0227273	0.886364	0	0	0
Schizophrenia		0.0714286	0.0714286	0.0714286	0.0714286	0.428571	0	0.25	0.0357143
Diagnosis		Accident	Sudden medical condition	Suicide	Undetermined	Undetermined/Accidental overdose
Bipolar Disorder		0.192308	0.192308	0.384615	0.0384615	0.192308
Control		0.136364	0.863636	0	0	0
Schizophrenia		0.142857	0.428571	0.25	0	0.178571
